# Supplementary material for: Efficient and safe correction of hemophilia A by lentiviral vector-transduced BOECs in an implantable device
Source: PubMed Central journal article supplement — Mol Ther Methods Clin Dev. 2021 Nov 3;23:551–66. doi: 10.1016/j.omtm.2021.10.015 (PMC8606349; doi:10.1016/j.omtm.2021.10.015), 2021-11-03
Supplement: mmc1.pdf [file mmc1.pdf]

## Supplemental information

### Efficient and safe correction of hemophilia A by lentiviral vector-transduced BOECs in an implantable device

**Cristina Olgasi, Chiara Borsotti, Simone Merlin, Thorsten Bergmann, Patrick Bittorf, Adeolu Badi Adewoye, Nicholas Wragg, Kelcey Patterson, Andrea Calabria, Fabrizio Benedicenti, Alessia Cucci, Alessandra Borchiellini, Berardino Pollio, Eugenio Montini, Delfina M. Mazzuca, Martin Zierau, Alexandra Stolzing, Philip.M. Toleikis, Joris Braspenning, and Antonia Follenzi**

*Lentiviral vector generation.* Third generation self-inactivating LVs were produced as previously published.<sup>1</sup> Briefly, 293T cells were expanded and transiently transfected by the calcium phosphate precipitation method with four plasmids encoding for two core packaging constructs (pMDLg/pol and pRSV-Rev), the envelope construct (pMD.VSV.G), and the transfer vector construct (pVEC.hBDD-FVIII.LV or pVEC.GFP.LV). The cell supernatant was harvested, and LV particles were concentrated by ultracentrifugation. For GMP-grade production of LV, the KR2i TFF System® (Spectrum Lab) was used according to the manufacturer's protocol. The product is ISO 9001:2008 certified. The system consists of a digital peristaltic pump, man/machine interface with a graphical LCD display, digital pressure monitor, KR2i Easy-Load Pump head, Automatic Backpressure Valve, filter module stand, and a real-time data collection software. The Tangential Flow Filtration (TFF) System uses a constant turbulent flow along a porous membrane to eliminate impurities from the sample. The tangential flow along the membrane prevents the accumulation of material on the membrane surface, as opposed to the classical "dead-end filtration", and allows the maximum recovery with high purity of the product.

*Analysis of lentiviral vector copy number.* Genomic DNA from LV-VEC.hBDD-FVIII and LV-VEC.GFP transduced BOECs was isolated using ReliaPrep gDNA Tissue Miniprep System (Promega). Real-time qPCR was used to evaluate the integrated LV copy numbers per cell in the DNA. Primers used for the qPCR recognize the Wpre sequence: Forward TTGCTTCCCGTATGGCTTTC, Reverse AGCTGACAGGTGGTGGCAAT. Finally, TU/ml was calculated with the following formula: TU/ml = (LV copies/cell × No. of transduced cells) / LV volume (expressed in ml).

*Evaluation of HIV-1 p24 in culture medium of transduced BOECs.* The presence of HIV-1 p24 was evaluated in culture medium of transduced cells after several time points and passages. Samples were analyzed using Liaison® XL (Diasorin) in the Virology Laboratory of the Hospital (Ospedale Maggiore della Carità di Novara, Italy).

*RNA isolation and RT-PCR.* Total RNA was isolated by Isol-RNA Lysis Reagent (Invitrogen). One µg of RNA was treated with DNase I (Thermo Scientific), and cDNAs were obtained using the RevertAid First Strand cDNA Synthesis Kit (Thermo Scientific). All PCRs were performed with GoTaq® Flexi DNA Polymerase (Promega). Primers, annealing temperatures, and product sizes are listed below in Supplemental Table 1. PCR products were resolved in 2% agarose gels using 100 bp DNA ladder (Thermo Scientific).

*In vitro tubulogenesis assay.* Pure Matrigel (BD Bioscience) was added to each well of a 24-well tissue culture plate and allowed to solidify at 37°C for 1 h. A cell suspension containing 10<sup>5</sup> BOECs, resuspended in culture medium, was placed on top of the Matrigel. Plates were incubated at 37°C, 5% CO<sub>2</sub> and observed and imaged at 16 h to detect capillary-like structure formation using an inverted microscope Leica ICC50.

*Flow cytometry analysis.* BOECs were characterized by flow cytometric analysis using antibodies listed in Supplemental Table 2. For each sample, 1.5×10<sup>5</sup> live events were acquired either on the Attune NxT Acoustic Focusing Cytometer (ThermoFisher Scientific, Waltham, MA, USA) or on BD FACSCanto II. Data were analyzed by FCS Express 6 (DeNovo Software, Glendale, CA, USA) or using FlowJo Software V10.6 (FlowJo LLC).

*Histopathological staining and analysis of samples from Cell Pouch™.* Sernova Cell Pouches™ with transplanted FVIII-BOECs were explanted from the mice, dissected into segments, fixed in 10% neutral buffered formalin, and paraffin-embedded. Sections (5-6 µm-thick) were stained with hematoxylin and eosin (H&E) and Masson's Trichrome (Nucro-Technics, Scarborough, Ontario).

*Immunostaining.* For immunofluorescence (IF) staining, BOECs were cultured on plastic and fixed in PFA 4%, for nuclear staining permeabilized in 0.5% PBS-Triton X100 and then incubated with blocking buffer (BB, 5% goat serum, 1% BSA, 0.1% Triton X-100 in PBS) at room temperature (RT). Mouse tissues were fixed in 4% PFA, equilibrated in sucrose, and embedded in cryostat embedding medium (Bio-Optica). Cryostat sections of 4-µm thickness were blocked in BB, incubated with primary antibody at RT, and then incubated in the dark at RT with the secondary antibody. The Cell Pouch™ with transplanted FVIII-BOECs was explanted from each animal, dissected into segments, and immediately cryopreserved in Tissue-Tek® O.C.T. compound (VWR) using an isopentane (2-methylbutane)/dry ice slurry (-70°C), and stored at -80°C. Prior to staining, cryostat sections (5-6 µm) were air-dried and pre-treated by immersion in cold acetone (-20°C), followed by washes in tris-buffered saline (TBS). Sections were blocked in TBS containing 10% goat serum and 1% BSA. A list of the antibodies used in these experiments is provided in Supplemental Table 3.

*Histology analysis and preservation techniques of tissues.* Following explantation, gross observations of Cell Pouches™ were made and images taken just prior to further histological processing. The 1 Plug Cell Pouches™ were then dissected into 3 segments (a – c) (see Figure 1). Segments 'a' and 'c' were processed for fixation in 10% neutral buffered formalin (Sernova Histology SOP-H900). Cell Pouches™ were washed from 10% formalin in 1X phosphate buffered saline (PBS) to 70% ethanol and subsequently processed for paraffin embedding. Segment 'b' was flash frozen for cryopreservation at the time of dissection using an isopentane/dry ice slurry and embedded in optimal cutting temperature compound (O.C.T.) (Sernova Histology SOP-H936). Cryopreserved or paraffin-embedded segments were then serially sectioned with a cryostat or microtome, respectively.

*Preparation of slides and high-resolution images with description of tissue stains.* Prior to staining or immunohistochemistry (IHC) analysis, sections were deparaffinized and rehydrated. Sections were stained with H&E for either formalin-fixed paraffin embedded (FFPE) or cryopreserved tissues. Masson's trichrome staining was performed on FFPE (Nucro-Technics, Scarborough, Ontario). For IHC staining, cryopreserved O.C.T. embedded tissues were dried, pre-treated with fixation and permeabilization with cold acetone (-20 °C, 10 min) and stained to detect microvessel

formation with von Willebrand factor (vWF). For human cell detection, sections were stained with a human leukocyte antigen (HLA-ABC) antibody. High resolution images and full slide scanning of the sections were imaged with an EVOS™ FL Auto 2 Imaging System (Invitrogen™, ThermoFisher Scientific) for both light microscopy (H&E and Masson's Trichrome) and fluorescent IHC (vWF/HLA).

*Analysis methodology.* The following histological assessment was conducted on the serial sections of formalin-fixed paraffin embedded (FFPE) segments taken within the chambers of each of the Cell Pouches™ from the animals across the doses and explanation time points: 1) stromal development, including type, distribution, and maturity; 2) vascularity, including neovascularization, established vessels, and their respective relationship to the chamber area; 3) inflammation, including type and relative abundance; and 4) hemorrhage. Masson's trichrome stains were assessed for collagen deposition as a marker of stromal maturity. Histological variables were assessed in a semi-quantitative fashion: - absent; + mild; ++ moderate; and +++ marked.

A histological assessment was conducted of the serial sections of frozen embedded segments taken within the chambers of each of the Cell Pouches™ from the animals across the doses and explanation time points: 1) cell transplant survival; 2) interactions and development post-transplant; 3) interactions of the surrounding pre-vascularized tissue of the Cell Pouch™; and 4) blood vessel formation relative to transplant cells. Histological variables were assessed in a semi-quantitative fashion: - negative (no staining); +/- equivocal staining; + mild positivity; ++ moderate positivity; +++ marked positivity; n/a image not available.

For histological assessment the slides and high-resolution images were sent to a certified pathologist for analysis. The assessment was conducted in a blinded-fashion, with no knowledge of the animal time points. The assessment was unblinded for writing the final report. Pathological definitions were as follows: Fibroblastic stroma – mesenchymal tissue consisting of fibroblastic cells and the extracellular matrix, including variable collagen produced by these cells; Collagen – usually a fibrillar protein within the extracellular matrix of connective tissue that provides mechanical strength to the tissues; Neovascularization – tiny, immature capillary-like vessels arising during new blood vessel formation and growth.

**A**

| Name of donor | Donor     | Mutation            | ml of peripheral blood samples | No. of BOECs colonies |
|---------------|-----------|---------------------|--------------------------------|-----------------------|
| pHA1          | Severe HA | c.6273G>A exon 21   | 25                             | 30                    |
| pA            | Severe HA | intron 22 inversion | 22                             | 60                    |
| pC            | Severe HA | unknown             | 25                             | 40                    |
| pD            | Severe HA | intron 22 inversion | 26                             | 30                    |

**B**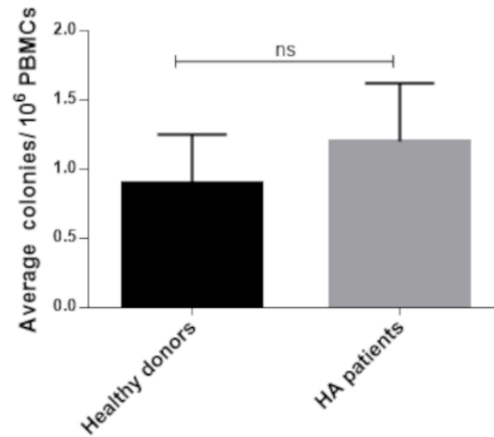**C**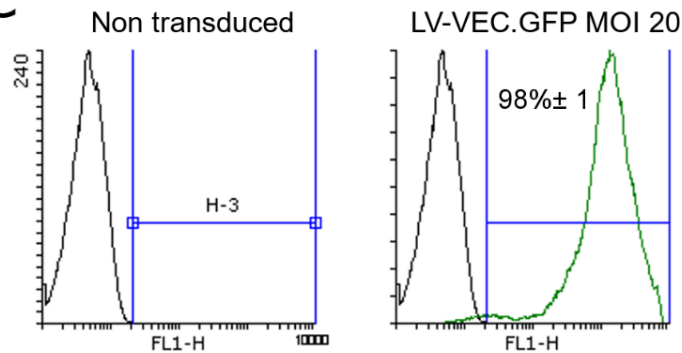

**Figure S 1.** (A) List of hemophilic patients from whom BOECs were isolated. (B) Average number of colonies calculated on  $10^6$  PBMCs cultured. Statistical analysis was performed using t-test, non-parametric, p-value 0.098. (C) Representative histograms for GFP evaluation by FACS analysis in healthy and HA BOECs transduced with an MOI of 20.

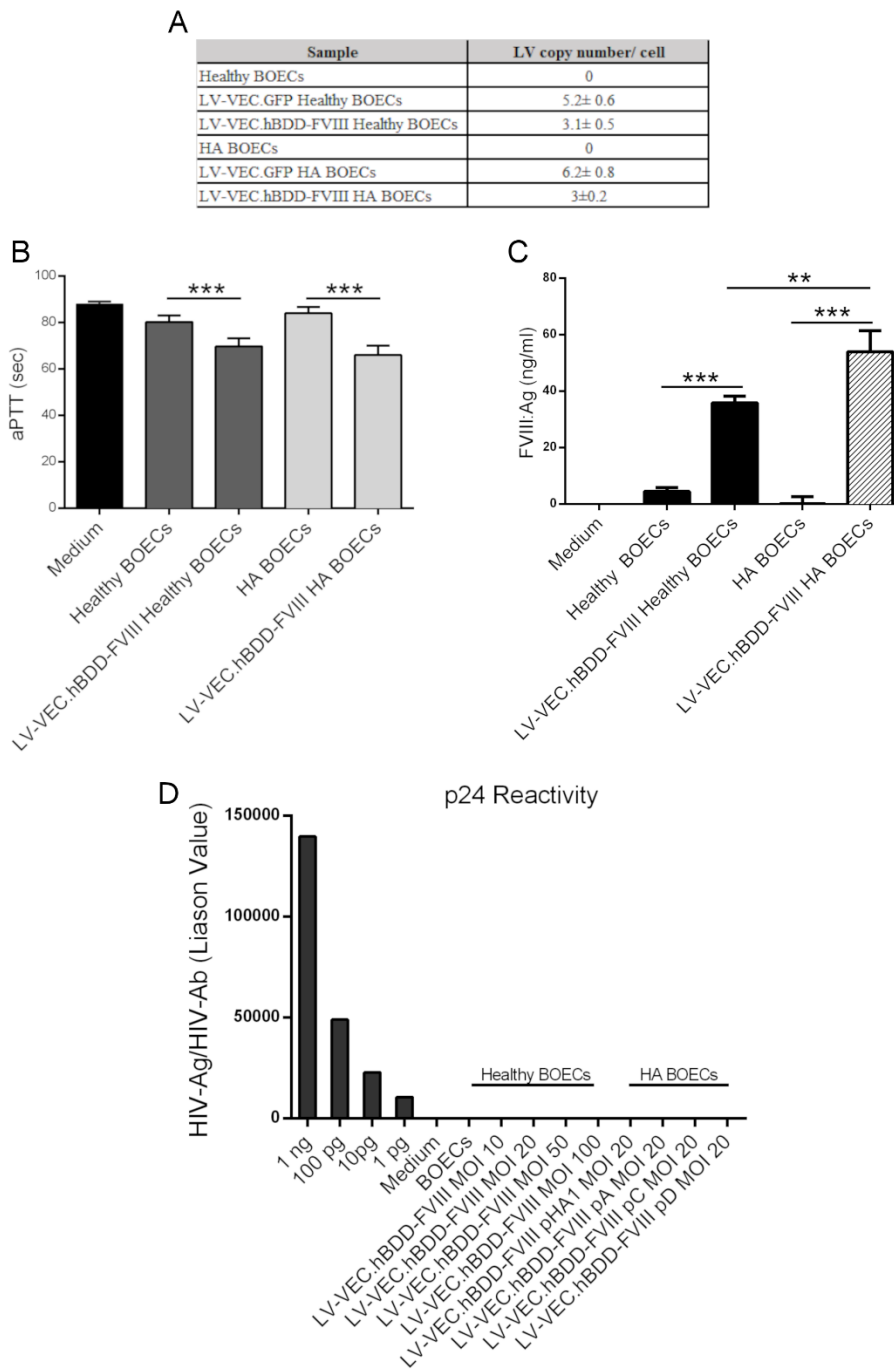

**Figure S2.** (A) qPCR analysis of integrated LV copy number/cell. (B) aPTT assay on supernatant of transduced and non-transduced healthy and HA BOECs (C) Antigen assay on supernatant of transduced and non-transduced healthy and HA BOECs. Data are expressed as mean  $\pm$  SD and are representative of four independent experiments. (D) HIV-1 p24 analysis on medium of non-transduced and transduced and healthy and HA BOECs at different MOIs.

**Table S1.** Histological features of NSG-HA Cell Pouches™ transplanted with FVIII-BOECs (H&E and Trichrome).

| Animal ID                                           | Inflammation | Fibroblastic stroma | Collagen deposition | Neovascularization | Established vessels | Hemorrhage |
|-----------------------------------------------------|--------------|---------------------|---------------------|--------------------|---------------------|------------|
| Cell Lot HA1, 4 weeks, 10×10 <sup>6</sup> (Dose 1)  |              |                     |                     |                    |                     |            |
| 396-LEP                                             | -            | +++                 | +                   | ++                 | *                   | -          |
| 398-REP                                             | -            | +++                 | ++                  | ++                 | ++                  | -          |
| Cell Lot HA1, 4 weeks, 5×10 <sup>6</sup> (Dose 2)   |              |                     |                     |                    |                     |            |
| 397-LEP                                             | -            | +                   | +                   | +                  | *                   | -          |
| 397-BEP                                             | -            | +++                 | +++                 | ++                 | ++                  | -          |
| Cell Lot HA1, 4 weeks, 2×10 <sup>6</sup> (Dose 3)   |              |                     |                     |                    |                     |            |
| 398-BEP                                             | -            | +++                 | +                   | ++                 | *                   | -          |
| Cell Lot HA1, 8 weeks, 10×10 <sup>6</sup> (Dose 1)  |              |                     |                     |                    |                     |            |
| 405-NEP                                             | -            | +++                 | +++                 | ++                 | ++                  | -          |
| Cell Lot HA1, 8 weeks, 5×10 <sup>6</sup> (Dose 2)   |              |                     |                     |                    |                     |            |
| 414-NEP                                             | -            | +++                 | +                   | ++                 | +                   | -          |
| 415-BEP                                             | -            | +++                 | +++                 | ++                 | +                   | -          |
| Cell Lot HA1, 8 weeks, 2×10 <sup>6</sup> (Dose 3)   |              |                     |                     |                    |                     |            |
| 402-LEP                                             | -            | +++                 | ++                  | ++                 | ++                  | -          |
| 405-REP                                             | -            | ++                  | +                   | ++                 | +                   | -          |
| 413-LEP                                             | -            | ++                  | +++                 | ++                 | *                   | -          |
| Cell Lot HA1, 12 weeks, 10×10 <sup>6</sup> (Dose 1) |              |                     |                     |                    |                     |            |
| 399-NEP                                             | -            | +++                 | ++                  | ++                 | +                   | -          |
| 413-BEP                                             | -            | +++                 | +++                 | ++                 | ++                  | -          |
| Cell Lot HA1, 12 weeks, 5×10 <sup>6</sup> (Dose 2)  |              |                     |                     |                    |                     |            |
| 406-REP                                             | -            | +++                 | ++                  | ++                 | *                   | -          |
| 406-NEP                                             | -            | +++                 | ++                  | ++                 | +                   | -          |
| 411-BEP                                             | -            | +++                 | +++                 | +                  | ++                  | -          |
| Cell Lot HA1, 12 weeks, 2×10 <sup>6</sup> (Dose 3)  |              |                     |                     |                    |                     |            |
| 396-REP                                             | -            | +++                 | +++                 | +                  | +                   | +          |
| 398-NEP                                             | -            | +++                 | ++                  | ++                 | +                   | -          |
| 399-BEP                                             | -            | +++                 | ++                  | ++                 | +                   | -          |
| Cell Lot HAA, 4 weeks, 10×10 <sup>6</sup> (Dose 1)  |              |                     |                     |                    |                     |            |
| 520-RREP                                            | -            | +++                 | ++                  | ++                 | ++                  | -          |
| Cell Lot HAA, 4 weeks, 5×10 <sup>6</sup> (Dose 2)   |              |                     |                     |                    |                     |            |
| 523-LEP                                             | -            | +++                 | ++                  | ++                 | +                   | -          |
| Cell Lot HAA, 8 weeks, 10×10 <sup>6</sup> (Dose 1)  |              |                     |                     |                    |                     |            |
| 520-NEP                                             | -            | +++                 | +++                 | ++                 | +                   | -          |
| 524-LEP                                             | -            | +++                 | +++                 | ++                 | ++                  | -          |
| Cell Lot HAA, 8 weeks, 5×10 <sup>6</sup> (Dose 2)   |              |                     |                     |                    |                     |            |
| 523-REP                                             | -            | +++                 | ++                  | ++                 | ++                  | -          |
| Cell Lot HAA, 12 weeks, 10×10 <sup>6</sup> (Dose 1) |              |                     |                     |                    |                     |            |
| 522-RREP                                            | -            | +++                 | ++                  | ++                 | ++                  | -          |
| 524-BEP                                             | -            | +++                 | ++                  | ++                 | ++                  | -          |
| <b>Controls (no cell transplant)</b>                |              |                     |                     |                    |                     |            |
| 4 weeks                                             |              |                     |                     |                    |                     |            |
| 525-REP                                             | -            | ++                  | ++                  | ++                 | +                   | -          |
| 8 weeks                                             |              |                     |                     |                    |                     |            |
| 521-RREP                                            | -            | +++                 | ++                  | ++                 | ++                  | -          |
| 525-RREP                                            | -            | +++                 | +                   | ++                 | ++                  | -          |
| 12 weeks                                            |              |                     |                     |                    |                     |            |
| 403-NEP                                             | -            | +++                 | +                   | ++                 | +                   | -          |
| 521-BEP                                             | -            | +++                 | ++                  | ++                 | ++                  | -          |
| 525-BEP                                             | -            | +++                 | ++                  | ++                 | ++                  | -          |

\*present immediately adjacent to Cell Pouch™

**Table S2.** Immunofluorescence of NSG-HA Mouse Cell Pouches™ transplanted with FVIII-BOECs.

| <b>Animal ID</b>                                          | <b>HLA-ABC (red)</b> | <b>vWF (green)</b> |
|-----------------------------------------------------------|----------------------|--------------------|
| <b>Cell Lot HA1, 4 weeks, 10×10<sup>6</sup> (Dose 1)</b>  |                      |                    |
| 396-LEP                                                   | +                    | +                  |
| 398-REP                                                   | +                    | +                  |
| <b>Cell Lot HA1, 4 weeks, 5×10<sup>6</sup> (Dose 2)</b>   |                      |                    |
| 397-REP                                                   | +                    | +                  |
| 397-LEP                                                   | n/a                  | n/a                |
| 414-LEP                                                   | +/-                  | +                  |
| <b>Cell Lot HA1, 4 weeks, 2×10<sup>6</sup> (Dose 3)</b>   |                      |                    |
| 398-BEP                                                   | -                    | ++                 |
| <b>Cell Lot HA1, 8 weeks, 10×10<sup>6</sup> (Dose 1)</b>  |                      |                    |
| 405-NEP                                                   | ++                   | -                  |
| <b>Cell Lot HA1, 8 weeks, 5×10<sup>6</sup> (Dose 2)</b>   |                      |                    |
| 414-NEP                                                   | +                    | n/a                |
| 415-BEP                                                   | +/-                  | +                  |
| <b>Cell Lot HA1, 8 weeks, 2×10<sup>6</sup> (Dose 3)</b>   |                      |                    |
| 402-LEP                                                   | +/-                  | +                  |
| 405-REP                                                   | +/-                  | +                  |
| 413-LEP                                                   | n/a                  | n/a                |
| <b>Cell Lot HA1, 12 weeks, 10×10<sup>6</sup> (Dose 1)</b> |                      |                    |
| 399-NEP                                                   | -                    | n/a                |
| 413-BEP                                                   | +/-                  | +                  |
| <b>Cell Lot HA1, 12 weeks, 5×10<sup>6</sup> (Dose 2)</b>  |                      |                    |
| 406-REP                                                   | +                    | +                  |
| 406-NEP                                                   | +/-                  | ++                 |
| 411-BEP                                                   | +/-                  | +                  |
| <b>Cell Lot HA1, 12 weeks, 2×10<sup>6</sup> (Dose 3)</b>  |                      |                    |
| 396-REP                                                   | +/-                  | +                  |
| 398-NEP                                                   | +                    | +                  |
| 399-BEP                                                   | +/-                  | +                  |
| <b>Cell Lot HAA, 4 weeks, 10×10<sup>6</sup> (Dose 1)</b>  |                      |                    |
| 520-RREP                                                  | ++                   | ++                 |
| <b>Cell Lot HAA, 4 weeks, 5×10<sup>6</sup> (Dose 2)</b>   |                      |                    |
| 520-REP                                                   | ++                   | +                  |
| 523-LEP                                                   | +++                  | +++                |
| <b>Cell Lot HAA, 8 weeks, 10×10<sup>6</sup> (Dose 1)</b>  |                      |                    |
| 520-NEP                                                   | ++                   | +                  |
| 524-LEP                                                   | +                    | +                  |
| <b>Cell Lot HAA, 8 weeks, 5×10<sup>6</sup> (Dose 2)</b>   |                      |                    |
| 523-REP                                                   | -                    | +++                |
| <b>Cell Lot HAA, 12 weeks, 10×10<sup>6</sup> (Dose 1)</b> |                      |                    |
| 522-RREP                                                  | ++                   | ++                 |
| 524-BEP                                                   | +++                  | +                  |
| <b>Controls</b>                                           |                      |                    |
| <b>4 weeks</b>                                            |                      |                    |
| 525-REP                                                   | -                    | ++                 |
| <b>8 weeks</b>                                            |                      |                    |
| 521-RREP                                                  | -                    | N/A                |
| 525-RREP                                                  | -                    | +                  |
| <b>12 weeks</b>                                           |                      |                    |
| 403-NEP                                                   | -                    | +                  |
| 521-BEP                                                   | -                    | +                  |
| 525-BEP                                                   | -                    | +                  |

- negative (no staining); +/- equivocal staining; + mild positivity; ++ moderate positivity; +++ marked positivity; N/A image not available

**Table S3.** Summary of sequencing reads and IS retrieved by group. Non redundant IS (column N.IS) retrieved from Healthy or HA Donors and transduced with VEC-FVIII or VEC-GFP were grouped. IS shared between different time points of the same transduction are counted once.

| Group               | Donor     | Transduction | Vector    | MOI                 | Timepoint        | Sample ID     | N.IS    |          |        |
|---------------------|-----------|--------------|-----------|---------------------|------------------|---------------|---------|----------|--------|
| Healthy.GFP         | D45       | 4            | VEC-GFP   | 10+10               | P5               | BOEC-008      | 1,862   |          |        |
|                     |           |              |           |                     | P5               | BOEC-001      |         |          |        |
|                     |           |              |           |                     | P8               | BOEC-002      |         |          |        |
| Healthy.FVIII       | D45       | 1            | VEC-FVIII | 20                  | P11              | BOEC-003      | 5,864   |          |        |
|                     |           |              |           |                     | P15              | BOEC-004      |         |          |        |
|                     |           |              |           |                     | 70 days HA Beads | BOEC-010      |         |          |        |
|                     |           |              |           |                     | 70 days HA Beads | BOEC-011      |         |          |        |
|                     |           |              |           |                     | 70 days HA Beads | BOEC-013      |         |          |        |
|                     | 2         | 3            | VEC-FVIII | 30                  | P11              | BOEC-005      |         |          |        |
|                     | 50        |              |           |                     | P11              | BOEC-006      |         |          |        |
|                     | D2        | 5            | VEC-FVIII | 20                  | P5               | BOEC-014      |         |          |        |
|                     | D3        | 6            | VEC-FVIII | 20                  | P5               | BOEC-043A     |         |          |        |
|                     |           |              |           |                     | P8               | BOEC-043B     |         |          |        |
| HA.GFP              | pHA1      | 8            | VEC-GFP   | 20                  | P5               | BOEC-020      | 106,554 |          |        |
|                     |           |              |           |                     | P8               | BOEC-021      |         |          |        |
|                     |           |              |           |                     | P12              | BOEC-022      |         |          |        |
|                     | pA        | 10           | VEC-GFP   | 20                  | P5               | BOEC-032      |         |          |        |
|                     |           |              |           |                     | P8               | BOEC-033      |         |          |        |
|                     | pC        | 12           | VEC-GFP   | 20                  | P5               | BOEC-040      |         |          |        |
|                     |           |              |           |                     | P8               | BOEC-041      |         |          |        |
|                     | HA.FVIII  | pHA1         | 7         | VEC-FVIII           | 20               | P5            |         | BOEC-016 | 28,069 |
|                     |           |              |           |                     |                  | P8            |         | BOEC-017 |        |
|                     |           |              |           |                     |                  | P10           |         | BOEC-018 |        |
| P15                 |           |              |           |                     |                  | BOEC-019      |         |          |        |
| P11                 |           |              |           |                     |                  | BOEC-024      |         |          |        |
| P11                 |           |              |           |                     |                  | BOEC-025      |         |          |        |
| P14                 |           |              |           |                     |                  | BOEC-026      |         |          |        |
| P11                 |           |              |           |                     |                  | HA1-VEC-UNILO |         |          |        |
| 91 days HA Beads    |           |              |           |                     |                  | BOEC-044A     |         |          |        |
| 91 days HA Beads    |           |              |           |                     |                  | BOEC-044B     |         |          |        |
| 91 days HA Beads    |           |              |           |                     |                  | BOEC-044C     |         |          |        |
| 2 weeks Cell Pouch  |           |              |           |                     |                  | 397-LEP       |         |          |        |
| 2 weeks Cell Pouch  |           |              |           |                     |                  | 398-LEP       |         |          |        |
| 4 weeks Cell Pouch  |           |              |           |                     |                  | 398-BEP       |         |          |        |
| 4 weeks Cell Pouch  |           |              |           |                     |                  | 414-LEP       |         |          |        |
| 4 weeks Cell Pouch  |           |              |           |                     |                  | 396-LEP       |         |          |        |
| 8 weeks Cell Pouch  |           |              |           |                     |                  | 402-LEP       |         |          |        |
| 8 weeks Cell Pouch  |           |              |           |                     |                  | 415-BEP       |         |          |        |
| 8 weeks Cell Pouch  |           |              |           |                     |                  | 405-NEP       |         |          |        |
| 12 weeks Cell Pouch |           |              |           |                     |                  | 398-NEP       |         |          |        |
| 12 weeks Cell Pouch |           |              |           |                     |                  | 406-REP       |         |          |        |
| 12 weeks Cell Pouch |           |              |           |                     |                  | 399-NEP       |         |          |        |
| P5                  |           |              |           |                     |                  | BOEC-027      |         |          |        |
| P8                  |           |              |           |                     |                  | BOEC-028      |         |          |        |
| P10                 |           |              |           |                     |                  | BOEC-029      |         |          |        |
| P14                 |           |              |           |                     |                  | HA-A-p14      |         |          |        |
| P15                 |           |              |           |                     |                  | BOEC-030      |         |          |        |
| P12                 |           |              |           |                     |                  | BOEC-031      |         |          |        |
| pA                  | 9         | VEC-FVIII    | 20        | 112 days HA Beads   | BOEC-045A        |               |         |          |        |
|                     |           |              |           | 112 days HA Beads   | BOEC-045B        |               |         |          |        |
|                     |           |              |           | 112 days HA Beads   | BOEC-045C        |               |         |          |        |
|                     |           |              |           | 4 weeks Cell Pouch  | 520-REP          |               |         |          |        |
|                     |           |              |           | 4 weeks Cell Pouch  | 520-RREP         |               |         |          |        |
|                     |           |              |           | 8 weeks Cell Pouch  | 520-LEP          |               |         |          |        |
|                     |           |              |           | 8 weeks Cell Pouch  | 520-NEP          |               |         |          |        |
|                     |           |              |           | 12 weeks Cell Pouch | 522-RREP         |               |         |          |        |
|                     |           |              |           | P5                  | BOEC-035         |               |         |          |        |
|                     |           |              |           | P8                  | BOEC-036         |               |         |          |        |
| pC                  | 11        | VEC-FVIII    | 20        | P8                  | HA-C-p8          |               |         |          |        |
|                     |           |              |           | P10                 | BOEC-037         |               |         |          |        |
|                     |           |              |           | P11                 | BOEC-039         |               |         |          |        |
|                     |           |              |           | P14                 | HA-C-p14         |               |         |          |        |
|                     |           |              |           | P15                 | BOEC-038         |               |         |          |        |
|                     |           |              |           | P19                 | HA-C-p19         |               |         |          |        |
|                     |           |              |           | 112 days HA Beads   | BOEC-046A        |               |         |          |        |
|                     |           |              |           | 112 days HA Beads   | BOEC-046B        |               |         |          |        |
| 112 days HA Beads   | BOEC-046C |              |           |                     |                  |               |         |          |        |
| pD                  | 13        | VEC-FVIII    | 20        | P16                 | HA-D-p16         |               |         |          |        |
| TOTAL               |           |              |           |                     |                  | 142,349       |         |          |        |



**Table S4.** Gene Ontology (GO) enrichment for Molecular Function and Biological Process. IS coordinates from IS retrieved from HA.VEC-FVIII, HA.VEC-GFP, Healthy.VEC-FVIII, and Healthy.VEC-GFP were analyzed by G.R.E.A.T. enrichment discovery algorithms. GO Biological Process, Molecular Function and Cellular Component databases highlighted significantly overrepresented gene classes. The gene classes found in at least two groups are highlighted in pink.

|                                                           | HA-FVIII                                                     | HA-GFP | Healthy-FVIII | Healthy-GFP |       |
|-----------------------------------------------------------|--------------------------------------------------------------|--------|---------------|-------------|-------|
| <b>GO Biological Process</b>                              | DNA repair                                                   | 123.92 | 300.00        | 27.77       | 16.37 |
|                                                           | nuclear division                                             | 60.43  | 291.50        | 19.74       | 15.95 |
|                                                           | RNA splicing, via transesterification reactions              | 60.17  | 238.91        | 15.58       | 15.85 |
|                                                           | DNA-templated transcription, termination                     | 55.84  | 219.42        | 10.20       | 10.20 |
|                                                           | regulation of defense response to virus                      | 55.05  | 213.72        | 14.37       | 8.56  |
|                                                           | ribonucleoprotein complex export from nucleus                | 54.65  | 211.29        | 14.37       | 8.87  |
|                                                           | mRNA export from nucleus                                     | 53.65  | 203.38        | 14.28       | 4.74  |
|                                                           | ribonucleoprotein complex localization                       | 51.97  | 203.64        | 13.80       | 4.12  |
|                                                           | termination of RNA polymerase II transcription               | 51.74  | 202.37        | 13.54       | 3.60  |
|                                                           | mRNA transport                                               | 51.13  | 201.37        | 12.75       |       |
|                                                           | DNA replication                                              | 50.97  | 193.91        | 12.21       |       |
|                                                           | DNA-templated transcription, elongation                      | 48.37  | 190.61        | 11.45       |       |
|                                                           | spindle organization                                         | 47.80  | 187.27        | 10.99       |       |
|                                                           | nuclear export                                               | 47.23  | 186.44        | 10.97       |       |
|                                                           | double-strand break repair                                   | 46.42  | 178.64        | 10.80       |       |
|                                                           | RNA localization                                             | 45.32  | 175.33        | 10.29       |       |
|                                                           | transcription elongation from RNA polymerase II promoter     | 44.66  | 170.65        | 7.97        |       |
|                                                           | mRNA 3'-end processing                                       | 44.20  | 170.00        | 7.15        |       |
|                                                           | mRNA 3'-end processing                                       | 43.29  | 169.27        | 6.99        |       |
|                                                           | cytoskeleton-dependent intracellular transport               | 38.25  | 168.66        | 6.96        |       |
|                                                           | ribonucleoprotein granule                                    | 39.97  | 156.55        | 12.88       | 13.38 |
|                                                           | mRNA cleavage and polyadenylation specificity factor complex | 31.67  | 154.72        | 7.74        | 13.07 |
|                                                           | mitotic spindle                                              | 32.31  | 154.28        | 6.89        | 5.85  |
|                                                           | catalytic step 2 spliceosome                                 | 31.21  | 151.94        | 6.80        | 4.99  |
|                                                           | mRNA cleavage factor complex                                 | 29.88  | 156.85        | 6.18        | 4.77  |
|                                                           | P-body                                                       | 27.62  | 138.99        | 5.82        | 4.74  |
|                                                           | transcription-elongation factor complex                      | 21.05  | 135.00        | 5.69        | 4.38  |
|                                                           | cytoplasmic stress granule                                   | 20.50  | 127.89        | 5.26        |       |
|                                                           | SWI/SNF superfamily-type complex                             | 20.37  | 125.56        | 4.65        |       |
|                                                           | AP-type membrane coat adaptor complex                        | 18.46  | 124.99        | 3.49        |       |
|                                                           | ribonucleoprotein complex                                    | 18.41  | 122.27        | 3.43        |       |
|                                                           | DNA repair complex                                           | 16.56  | 114.17        | 2.70        |       |
|                                                           | Cdk-ING E3 ubiquitin ligase complex                          | 15.00  | 111.26        |             |       |
|                                                           | microtubule end                                              | 13.52  | 108.03        |             |       |
|                                                           | cell cycle                                                   | 11.34  | 98.22         |             |       |
| multivesicular body                                       | 10.66                                                        | 95.98  |               |             |       |
| spliceosome                                               | 9.73                                                         | 95.98  |               |             |       |
| clathrin coat of endocytic vesicle                        | 8.71                                                         | 84.31  |               |             |       |
| integrator complex                                        | 88.71                                                        | 300.00 | 20.74         | 9.82        |       |
| cathepsin binding                                         | 39.49                                                        | 149.66 | 10.06         | 5.55        |       |
| helicase activity                                         | 31.92                                                        | 140.04 | 9.76          | 5.42        |       |
| DNA helicase activity                                     | 30.11                                                        | 138.01 | 9.48          | 4.26        |       |
| ubiquitin-like protein binding                            | 30.09                                                        | 135.33 | 7.03          | 2.95        |       |
| ubiquitin binding                                         | 27.16                                                        | 112.11 | 5.27          |             |       |
| ATP-dependent helicase activity                           | 23.92                                                        | 101.51 | 4.41          |             |       |
| transition factor activity, RNA binding                   | 22.80                                                        | 99.30  |               |             |       |
| hydase R methyltransferase activity                       | 18.89                                                        | 94.64  |               |             |       |
| damaged DNA binding                                       | 15.69                                                        | 90.68  |               |             |       |
| histone deacetylase activity                              | 15.66                                                        | 88.30  |               |             |       |
| protein deacetylase activity                              | 15.31                                                        | 86.09  |               |             |       |
| RNA binding                                               | 13.03                                                        | 85.32  |               |             |       |
| transforming growth factor beta binding                   | 11.43                                                        | 73.66  |               |             |       |
| thioesterase binding                                      | 11.19                                                        | 72.80  |               |             |       |
| type I transforming growth factor beta receptor binding   | 9.71                                                         | 65.44  |               |             |       |
| 3'-5' DNA helicase activity                               | 9.24                                                         | 59.23  |               |             |       |
| cyclin-dependent protein serine/threonine kinase activity | 8.50                                                         | 58.38  |               |             |       |
| cyclin-dependent protein kinase activity                  | 8.33                                                         | 52.98  |               |             |       |
| RNA polymerase II carboxy-terminal domain kinase activity | 5.52                                                         | 51.70  |               |             |       |
| <b>GO Cellular Component</b>                              | ribonucleoprotein complex                                    | 300.00 | 300.00        | 12.88       | 13.38 |
|                                                           | intracellular ribonucleoprotein complex                      | 27.74  | 27.74         | 7.74        | 13.07 |
|                                                           | protein kinase complex                                       | 6.89   | 6.89          | 6.89        | 5.85  |
|                                                           | mitotic spindle pole                                         | 6.80   | 6.80          | 6.80        | 4.99  |
|                                                           | serine/threonine protein kinase complex                      | 6.18   | 6.18          | 6.18        | 4.77  |
|                                                           | actomyosin                                                   | 5.82   | 5.82          | 5.82        | 4.74  |
|                                                           | checkpoint clamp complex                                     | 5.69   | 5.69          | 5.69        | 4.38  |
|                                                           | tethering complex                                            | 5.26   | 5.26          | 5.26        |       |
|                                                           | clathrin adaptor complex                                     | 4.65   | 4.65          | 4.65        |       |
|                                                           | nuclear ribosome                                             | 3.49   | 3.49          | 3.49        |       |
|                                                           | replicome                                                    | 3.43   | 3.43          | 3.43        |       |
|                                                           | microtubule end                                              | 2.70   | 2.70          | 2.70        |       |
|                                                           | cathepsin binding                                            | 20.74  | 20.74         | 20.74       | 9.82  |
|                                                           | ribonucleoprotein complex binding                            | 10.06  | 10.06         | 10.06       | 5.55  |
|                                                           | helicase activity                                            | 9.76   | 9.76          | 9.76        | 5.42  |
| protein N-terminus binding                                | 9.48                                                         | 9.48   | 9.48          | 4.26        |       |
| DNA polymerase activity                                   | 7.03                                                         | 7.03   | 7.03          | 2.95        |       |
| DNA-directed DNA polymerase activity                      | 5.27                                                         | 5.27   | 5.27          |             |       |
| 4 iron, 4 sulfur cluster binding                          | 4.41                                                         | 4.41   | 4.41          |             |       |
| <b>GO Molecular Function</b>                              | cathepsin binding                                            | 20.74  | 20.74         | 20.74       | 9.82  |
|                                                           | ribonucleoprotein complex binding                            | 10.06  | 10.06         | 10.06       | 5.55  |
|                                                           | helicase activity                                            | 9.76   | 9.76          | 9.76        | 5.42  |
|                                                           | protein N-terminus binding                                   | 9.48   | 9.48          | 9.48        | 4.26  |
|                                                           | DNA polymerase activity                                      | 7.03   | 7.03          | 7.03        | 2.95  |
|                                                           | DNA-directed DNA polymerase activity                         | 5.27   | 5.27          | 5.27        |       |
|                                                           | 4 iron, 4 sulfur cluster binding                             | 4.41   | 4.41          | 4.41        |       |

**Table S5.** Common Insertion site (CIS) analysis in 2 healthy BOECs, and 4 HA BOECs.

| Subject ID | Transduction | Vector    | MOI   | Gene Name | Chr. | Integration locus | N IS per Gene | average transcript length | integration frequency with tolerance | tdist fdr |
|------------|--------------|-----------|-------|-----------|------|-------------------|---------------|---------------------------|--------------------------------------|-----------|
| dD3        | 6            | VEC-FVIII | 20    | SPG7      | 16   | 89,585,048        | 5             | 39,358                    | 0.036                                | 0.078     |
| dD45       | 1            | VEC-FVIII | 20    | SZT2      | 1    | 43,952,080        | 13            | 64,363                    | 0.079                                | 0.006     |
|            |              |           |       | MROH1     | 8    | 145,269,797       | 10            | 89,530                    | 0.053                                | 0.054     |
|            |              |           |       | TRAF2     | 9    | 139,825,912       | 6             | 40,103                    | 0.043                                | 0.114     |
|            |              |           |       | CPSF1     | 8    | 145,629,805       | 5             | 16,288                    | 0.043                                | 0.114     |
| dD45       | 4            | VEC-GFP   | 10+10 | NPLOC4    | 17   | 79,591,992        | 10            | 36,856                    | 0.073                                | 0.005     |
|            |              |           |       | TRAF2     | 9    | 139,825,791       | 8             | 40,103                    | 0.057                                | 0.020     |
| pA         | 10           | VEC-GFP   | 20    | SZT2      | 1    | 43,955,802        | 117           | 64,363                    | 0.712                                | 0.510     |
|            |              |           |       | NPLOC4    | 17   | 79,602,479        | 106           | 36,856                    | 0.775                                | 0.510     |
| pA         | 9            | VEC-FVIII | 20    | NPLOC4    | 17   | 79,600,522        | 7             | 36,856                    | 0.051                                | 0.067     |
|            |              |           |       | PMPCA     | 9    | 139,315,510       | 5             | 13,189                    | 0.044                                | 0.108     |
| pC         | 11           | VEC-FVIII | 20    | SZT2      | 1    | 43,955,797        | 49            | 64,363                    | 0.298                                | 0.039     |
|            |              |           |       | MROH1     | 8    | 145,299,016       | 46            | 89,530                    | 0.243                                | 0.097     |
|            |              |           |       | NPLOC4    | 17   | 79,600,496        | 45            | 36,856                    | 0.329                                | 0.032     |
| pD         | 13           | VEC-FVIII | 20    | NSD1      | 5    | 176,707,259       | 10            | 166,759                   | 0.037                                | 0.100     |
|            |              |           |       | ZGPAT     | 20   | 62,354,996        | 6             | 28,232                    | 0.047                                | 0.047     |
|            |              |           |       | NONO      | X    | 70,517,315        | 5             | 17,977                    | 0.042                                | 0.074     |
|            |              |           |       | MAN1B1    | 9    | 139,997,714       | 4             | 22,261                    | 0.033                                | 0.139     |
|            |              |           |       | PTBP1     | 19   | 808,672           | 4             | 14,936                    | 0.035                                | 0.122     |
| pHA1       | 7            | VEC-FVIII | 20    | PHRF1     | 11   | 599,765           | 8             | 35,777                    | 0.059                                | 0.077     |
|            |              |           |       | ZNF251    | 8    | 145,983,504       | 8             | 34,677                    | 0.059                                | 0.077     |
| pHA1       | 8            | VEC-GFP   | 20    | MROH1     | 8    | 145,292,887       | 121           | 89,530                    | 0.638                                | 0.337     |
|            |              |           |       | SZT2      | 1    | 43,954,990        | 112           | 64,363                    | 0.681                                | 0.337     |
|            |              |           |       | NPLOC4    | 17   | 79,599,815        | 94            | 36,856                    | 0.687                                | 0.337     |
|            |              |           |       | ZNF251    | 8    | 145,987,938       | 77            | 34,677                    | 0.572                                | 0.361     |

**Table S6.** Primers used in RT-PCR and Real Time.

| Gene              | Synthetic oligonucleotide             | Expected band |
|-------------------|---------------------------------------|---------------|
| <i>ACTB</i>       | F: 5'-GAGAAAATCTGGCACCACACC-3'        | 412 bp        |
|                   | R: 5'-CGACGTAGCACAGCTTCTC-3'          |               |
| <i>KDR</i>        | F: 5'- TGCAAGGACCAAGGAGACTATGT -3'    | 459 bp        |
|                   | R: 5'- TAGGATGATGACAAGAAGTAGCC -3'    |               |
| <i>TEK</i>        | F: 5'-AGACCAGCACGTTGATGTGA-3'         | 127 bp        |
|                   | R: 5'-TGGGTTGCTTGACCCTATGT-3'         |               |
| <i>CDH5</i>       | F: 5'-CAGCCCAAAGTGTGTGAGAA-3'         | 162 bp        |
|                   | R: 5'-TGTGATGTTGGCCGTGTTAT-3'         |               |
| <i>PECAM1</i>     | F: 5'-AGGTCAGCAGCATCGTGGTCAACAT-3'    | 469 bp        |
|                   | R: 5'-GTGGGGTTGTCTTTGAATACCGCAG-3'    |               |
| <i>VWF</i>        | F: 5'- TGGAGTACCCCTTCAGCGAG -3'       | 263 bp        |
|                   | R: 5'- GTTGGCATTAGGGCCCACTC -3'       |               |
| F8 A2-A3 domain   | F: 5'- TGCCACAACCTCAGACTTTCG-3'       | 184 bp        |
|                   | R: 5'- GATGGCGTTTCAAGACTGGT -3'       |               |
| <i>IFI27</i>      | F: 5'- TCTGGCTCTGCCGTAGTTTT-3'        | 243 bp        |
|                   | R: 5'- GAACTTGGTCAATCCGGAGA -3'       |               |
| <i>CDH11</i>      | F: 5'- TGGCAGCAAGTATCCAATGG-3'        | 200 bp        |
|                   | R: 5'- TTTGGTTACGTGGTAGGCAC-3'        |               |
| <i>NRCAM</i>      | F: 5'- TCCAGAAGGCAATGCAAGTA-3'        | 117 bp        |
|                   | R: 5'- AGCATTCCATCTTCCTTTCG -3'       |               |
| <i>COL4A1</i>     | F: 5'- GGCCTATGAGTCCTGGGTAC -3'       | 146 bp        |
|                   | R: 5'- TGGATTTCAGGGGATGCCAG -3'       |               |
| <i>ENG</i>        | F: 5'- CCACTGCACTTGGCCTACA -3'        | 107 bp        |
|                   | R: 5'- GCCCACTCAAGGATCTGG -3'         |               |
| <i>GATA3</i>      | F: 5'- GAACCGGCCCTCATTAAAG-3'         | 216 bp        |
|                   | R: 5'- CTTGCATATCTGACCTATTCTAGCGTG-3' |               |
| <i>ITGA5</i>      | F: 5'- TGCAGTGTGAGGCTGTGTACA -3'      | 88 bp         |
|                   | R: 5'- GTGGCCACCTGACGCTCT -3'         |               |
| <i>ETS-1</i>      | F: 5'- CATATCAAGTTAATGGAGTC-3'        | 268 bp        |
|                   | R: 5'- TGTTTGATAGCAAAGTAGTC -3'       |               |
| <i>ETS-2</i>      | F: 5'- GTGGAGTGAGCAACAGGTAT-3'        | 282 bp        |
|                   | R: 5'- CCAAACCTAATGTATTGCTG -3'       |               |
| <i>Wpre/ dNEF</i> | F: 5'- TCTGGCTCTGCCGTAGTTTT-3'        | 200 bp        |
|                   | R: 5'- GGCTAAGATCTACAGCTGCCTTG-3'     |               |

**Table S7.** Antibodies used for FACS staining.

| Antibody           | Reactivity | Manufacturer                          | Format            |
|--------------------|------------|---------------------------------------|-------------------|
| CD45               | Human      | clone 32D12,<br>Miltenyi Biotec       | PE                |
| Isotype mouse IgG1 |            | ThermoFisher<br>Scientific            | PE                |
| CD34               | Human      | clone<br>4H11[APG],<br>Invitrogen     | PE                |
| Isotype mouse IgG1 |            | ThermoFisher<br>Scientific            | PE                |
| Anti -mouse        | Mouse      | Thermo<br>Scientific                  | 488               |
| FVIII              | Human      | Clone GMA-<br>8015,<br>Green Mountain | Not<br>conjugated |

|                                                            |       |                                    |     |
|------------------------------------------------------------|-------|------------------------------------|-----|
| KDR                                                        | Human | clone ES8-20E6,<br>Miltenyi Biotec | PE  |
| Isotype mouse IgG1                                         |       | ThermoFisher<br>Scientific         | PE  |
| Tie-2                                                      | Human | clone REA198,<br>Miltenyi Biotec   | PE  |
| REA Control Antibody,<br>human IgG1, REAfinity<br>(REA293) |       | Miltenyi Biotec                    | PE  |
| CD31                                                       | Human | clone MEM-05;<br>Invitrogen        | APC |
| Isotype mouse IgG1                                         |       | ThermoFisher<br>Scientific         | APC |
| VE-cadherin                                                | Human | clone REA199,<br>Miltenyi Biotec   | PE  |
| REA Control Antibody,<br>human IgG1, REAfinity<br>(REA293) |       | Miltenyi Biotec                    | PE  |

**Table S8.** Antibodies used for immunofluorescence staining.

| <b>Primary antibodies</b>   | <b>Host</b> | <b>Reactivity</b>     | <b>Manufacturer</b>                  | <b>Dilution</b> |
|-----------------------------|-------------|-----------------------|--------------------------------------|-----------------|
| FVIII                       | Mouse       | Human                 | Clone GMA-8015,<br>Green Mountain    | 1:100           |
| CD31                        | Mouse       | Human                 | BD Bioscience                        | 1:100           |
| HLA-ABC                     | Rat         | Human                 | Novus Biologicals, clone<br>YTH862.2 | 1:150           |
| von Willebrand Factor       | Rabbit      | H, M, R               | Millipore                            | 1:100           |
| GFP                         | Rabbit      |                       | Life Technologies                    | 1:300           |
| <b>Secondary antibodies</b> |             |                       |                                      |                 |
|                             |             | <b>Fluorophores</b>   | <b>Manufacturer</b>                  | <b>Dilution</b> |
| Goat anti-Rabbit            |             | AlexaFluor 488 or 546 | Life Technologies                    | 1:500/1:1000    |
| Goat anti-Rat               |             | AlexaFluor 594        |                                      | 1:500           |
| Goat anti-Mouse             |             | AlexaFluor 488 or 546 | Life Technologies                    | 1:500           |

## **Supplemental References**

1. Follenzi, A., and Naldini, L. (2002). Generation of HIV-1 derived lentiviral vectors. *Methods Enzymol* 346, 454-465.
